# Supplementary material
Source: MDPI journal article supplement (https://www.mdpi.com/1996-1073/14/18/5987)
Supplement: s1 [file s1]

Archive with 2 entries (2 files):
- Supplement_1_energies-1303539.pdf
- Supplement_2_energies-1303539.pdf
