# Supplementary material
Source: MDPI journal article supplement (https://www.mdpi.com/1996-1073/14/18/5987)
Supplement: s1 [file s1 › Supplement_1_energies-1303539.pdf]

# Exploring sustainable aspects regarding the Food Supply Chain, Agri-Food Quality Standards, and Global Trade: an empirical study among experts from the European Union and the United States

Katja Pietrzyck, Sebastian Jarzębowski and Brigitte Petersen

**Supplement S1:** List of abbreviations and acronyms

|                     |                                                                           |
|---------------------|---------------------------------------------------------------------------|
| AHK .....           | German Chamber of Commerce Abroad                                         |
| BMWi .....          | German Federal Ministry for Economic Affairs and Energy                   |
| BRC Standard .....  | British Retail Consortium Standard                                        |
| CAP .....           | Common Agricultural Policy                                                |
| DG SANTE .....      | Directorate-General for Health and Food Safety of the European Commission |
| DIHK .....          | Association of German Chambers of Industry and Commerce in Germany        |
| EC .....            | European Commission                                                       |
| EU .....            | European Union                                                            |
| F2F strategy .....  | Farm to Fork Strategy                                                     |
| FSC .....           | Food Supply Chain                                                         |
| FTA .....           | Free Trade Agreement                                                      |
| GDP .....           | Gross Domestic Product                                                    |
| GLOBALG.A.P. ....   | Global Standards for Good Agricultural Practices                          |
| GMO .....           | Genetically modified organism                                             |
| GMP+ Standard ..... | GMP+ International Feed Certification scheme                              |
| Green Deal .....    | European Green Deal                                                       |
| IFS .....           | International Featured Standards                                          |

|                     |                                                                         |
|---------------------|-------------------------------------------------------------------------|
| QM .....            | Quality Management                                                      |
| QS Standard .....   | Qualität und Sicherheit GmbH; Quality scheme for food safety in Germany |
| RGIT .....          | Delegation of German Industry and Commerce in Washington D.C., US       |
| SDGs .....          | Sustainable Development Goals                                           |
| SFSC .....          | Short Food Supply Chain                                                 |
| SPS Agreement ..... | Agreement on Sanitary and Phytosanitary Measures                        |
| TBL .....           | Triple Bottom Line                                                      |
| TTIP .....          | Transatlantic Trade and Investment Partnership                          |
| UN .....            | United Nations                                                          |
| US .....            | United States of America                                                |
