# Supplementary material
Source: MDPI journal article supplement (https://www.mdpi.com/1996-1073/14/18/5987)
Supplement: s1 [file s1 › Supplement_2_energies-1303539.pdf]

# Exploring sustainable aspects regarding the Food Supply Chain, Agri-Food Quality Standards, and Global Trade: an empirical study among experts from the European Union and the United States

Katja Pietrzyck, Sebastian Jarzębowski and Brigitte Petersen

**Supplement S2:** Questionnaire and codebook

**Note:** For the online survey, the questionnaire in German language version was used. The English translation was prepared in the process of this publication.

**Project:** Online survey of US-EU experts at the AHKs regarding global trade in agri-food products on the example of the free trade agreement TTIP

Survey software: EFSSurvey, Questback GmbH: academic program Unipark

Display options: show filters

Select language: German

Export character set: UTF-8

Export as: Excel

Export date: 31.10.2016 13:55:44

Project ID: 279516

URL of the survey: [https://ww2.unipark.de/uc/Root-Team\\_Abteilung\\_PGM/33eb/](https://ww2.unipark.de/uc/Root-Team_Abteilung_PGM/33eb/)

Number of variables in the survey table: 192

Introduction: System page (PGID 1618917)

The purpose of the survey is to provide a scientific analysis of developments in global markets regarding the role of international quality standards in relation to global trade in agri-food products. The planned free trade agreement (Transatlantic Trade and Investment Partnership, TTIP) between the EU and the US is of particular importance. The research project is intended to examine not only the situation in Germany, but also the variety of international quality standards throughout the EU and the US. For this reason, we ask for your opinion! When answering the questions, please think only about the agricultural and food sector!

The survey is divided into three technical parts and one general question part:

1. seven questions on TTIP
2. five questions on trade with the US and EU member states respectively
3. five questions on quality management in the agri-food sector
4. four general concluding questions

Participating in the survey will take approximately 10-20 minutes of your time.

Most of the questions can be answered easily by ticking the appropriate box and additionally, there is usually the possibility to add comments and supplementary information (e.g., literature / source references to statistics or similar) via a text field. The progress screen (at the top of each page) shows you what percentage of the questionnaire you have already answered. Please use the buttons provided at the bottom of each page for navigation.

Thank you for your participation and support!

Yours sincerely  
 Katja Pietrzyck  
 University of Bonn, International FoodNetCenter  
 Katzenburgweg 7-9, 53115 Bonn  
 If you have any questions, please contact: katpiet(at)uni-bonn.de

Standard page (PGID 1618919)

Please enter the name of your AHK. The survey will be evaluated anonymously and without reference to this information. (q\_2961476 - type 141)

| variable name | external variable name | varchar | AHK query |
|---------------|------------------------|---------|-----------|
| v_3           | v_3                    |         |           |

Do you belong to an EU-AHK or a US-AHK? (q\_2973305 - type 111)

| variable name | external variable name | int | filter question |
|---------------|------------------------|-----|-----------------|
| v_124         | v_124                  |     |                 |
|               |                        | 1   | EU-AHK          |
|               |                        | 2   | US-AHK          |

#### Filter US (PGID 1618920)

Standard page (PGID 1618921)

Part 1: Questions on TTIP

1a) In your opinion, how high is the level of information on the TTIP negotiations and/or the TTIP treaty content in the US? (q\_2962543 - type 311)

| variable name | external variable name | int | business professionals |
|---------------|------------------------|-----|------------------------|
| v_13          | v_13                   |     |                        |
|               |                        | 1   | very high              |
|               |                        | 2   | high                   |
|               |                        | 3   | intermediate           |
|               |                        | 4   | low                    |
|               |                        | 5   | very low               |
|               |                        | 6   | do not know            |
| variable name | external variable name | int | general public         |
| v_14          | v_14                   |     |                        |
|               |                        | 1   | very high              |
|               |                        | 2   | high                   |
|               |                        | 3   | intermediate           |
|               |                        | 4   | low                    |
|               |                        | 5   | very low               |
|               |                        | 6   | do not know            |

1b) Are there counter-movements / TTIP opponents? (q\_2965551 - type 111)

| variable name | external variable name | int | counterparts                     |
|---------------|------------------------|-----|----------------------------------|
| v_33          | v_33                   |     |                                  |
|               |                        | 1   | Yes, there are TTIP opponents.   |
|               |                        | 2   | No, there are no TTIP opponents. |
|               |                        | 3   | do not know                      |

## Notes / Supplementary information (q\_2965552 - type 142)

| variable name | external variable name |      |            |
|---------------|------------------------|------|------------|
| v_34          | v_34                   | blob | text field |

## 2) Which reliable sources of information on TTIP does your chamber use? (q\_2965553 - type 143)

| variable name | external variable name |         |                        |
|---------------|------------------------|---------|------------------------|
| v_35          | v_35                   | varchar | 1 <sup>st</sup> choice |
| variable name | external variable name |         |                        |
| v_36          | v_36                   | varchar | 2nd choice             |
| variable name | external variable name |         |                        |
| v_37          | v_37                   | varchar | 3rd choice             |

## Notes / Supplementary information (q\_2965556 - type 142)

| variable name | external variable name |      |            |
|---------------|------------------------|------|------------|
| v_38          | v_38                   | blob | text field |

## 3) What is the awareness of the TTIP issue among your member companies? (q\_2965560 - type 111)

| variable name | external variable name |     |                       |
|---------------|------------------------|-----|-----------------------|
| v_44          | v_44                   | int | awareness of the TTIP |
|               |                        | 1   | very high awareness   |
|               |                        | 2   | high awareness        |
|               |                        | 3   | neutral awareness     |
|               |                        | 4   | low awareness         |
|               |                        | 5   | very low awareness    |
|               |                        | 6   | do not know           |

## Notes / Supplementary information (q\_2965579 - type 142)

| variable name | external variable name |      |            |
|---------------|------------------------|------|------------|
| v_45          | v_45                   | blob | text field |

## 4) How many enquiries has your chamber received on TTIP? (q\_2965607 - type 143)

| variable name | external variable name | varchar (with type check: Integer) | monthly |
|---------------|------------------------|------------------------------------|---------|
| v_71          | v_71                   |                                    |         |
| variable name | external variable name | varchar (with type check: Integer) | 2016    |
| v_224         | v_224                  |                                    |         |
| variable name | external variable name | varchar (with type check: Integer) | 2015    |
| v_72          | v_72                   |                                    |         |
| variable name | external variable name | varchar (with type check: Integer) | 2014    |
| v_73          | v_73                   |                                    |         |

## Notes / Supplementary information (q\_2965610 - type 142)

| variable name | external variable name |      |            |
|---------------|------------------------|------|------------|
| v_74          | v_74                   | blob | text field |

## 5) Which companies do you think will benefit from TTIP? (q\_2965611 type 121)

| variable name | external variable name | int | Micro enterprises (up to 9 Employees, up to € 2 million Turnover/year)        |
|---------------|------------------------|-----|-------------------------------------------------------------------------------|
| v_117         | v_117                  |     |                                                                               |
|               |                        | 0   | not quoted                                                                    |
|               |                        | 1   | quoted                                                                        |
| variable name | external variable name | int | Small enterprises (up to 49 Employees, up to € 10 million Turnover/year)      |
| v_118         | v_118                  |     |                                                                               |
|               |                        | 0   | not quoted                                                                    |
|               |                        | 1   | quoted                                                                        |
| variable name | external variable name | int | Medium-sized companies (up to 249 Employees, up to €50 million Turnover/year) |
| v_123         | v_123                  |     |                                                                               |
|               |                        | 0   | not quoted                                                                    |
|               |                        | 1   | quoted                                                                        |
| variable name | external variable name | int | Large enterprises (over 250 Employees, over € 50 million Turnover/year)       |
| v_119         | v_119                  |     |                                                                               |
|               |                        | 0   | not quoted                                                                    |
|               |                        | 1   | quoted                                                                        |
| variable name | external variable name | int | none of the above                                                             |
| v_121         | v_121                  |     |                                                                               |
|               |                        | 0   | not quoted                                                                    |
|               |                        | 1   | quoted                                                                        |
| variable name | external variable name | int | do not know                                                                   |
| v_122         | v_122                  |     |                                                                               |
|               |                        | 0   | not quoted                                                                    |
|               |                        | 1   | quoted                                                                        |

## Notes / Supplementary information (q\_2965633 - type 142)

| variable name | external variable name | blob | text field |
|---------------|------------------------|------|------------|
| v_76          | v_76                   |      |            |

## 6) Which branches of the agri-food sector will be the winners/losers of TTIP? (q\_2965636 - type 311)

| variable name | external variable name | int | non-alcoholic beverages |
|---------------|------------------------|-----|-------------------------|
| v_77          | v_77                   |     |                         |
|               |                        | 1   | winner                  |
|               |                        | 2   | neither                 |
|               |                        | 3   | loser                   |
|               |                        | 4   | do not know             |

| variable name<br>v_78  | external variable name<br>v_78  | int | alcoholic beverages                            |
|------------------------|---------------------------------|-----|------------------------------------------------|
|                        |                                 | 1   | winner                                         |
|                        |                                 | 2   | neither                                        |
|                        |                                 | 3   | loser                                          |
|                        |                                 | 4   | do not know                                    |
| variable name<br>v_79  | external variable name<br>v_79  | int | meat and sausage products                      |
|                        |                                 | 1   | winner                                         |
|                        |                                 | 2   | neither                                        |
|                        |                                 | 3   | loser                                          |
|                        |                                 | 4   | do not know                                    |
| variable name<br>v_80  | external variable name<br>v_80  | int | fruits and vegetables, potatoes                |
|                        |                                 | 1   | winner                                         |
|                        |                                 | 2   | neither                                        |
|                        |                                 | 3   | loser                                          |
|                        |                                 | 4   | do not know                                    |
| variable name<br>v_81  | external variable name<br>v_81  | int | dairy products<br>(cheese, butter, milk, etc.) |
|                        |                                 | 1   | winner                                         |
|                        |                                 | 2   | neither                                        |
|                        |                                 | 3   | loser                                          |
|                        |                                 | 4   | do not know                                    |
| variable name<br>v_82  | external variable name<br>v_82  | int | confectionery, sweets and salty<br>snacks      |
|                        |                                 | 1   | winner                                         |
|                        |                                 | 2   | neither                                        |
|                        |                                 | 3   | loser                                          |
|                        |                                 | 4   | do not know                                    |
| variable name<br>v_225 | external variable name<br>v_225 | int | bread and pastry products, mills               |
|                        |                                 | 1   | winner                                         |
|                        |                                 | 2   | neither                                        |
|                        |                                 | 3   | loser                                          |
|                        |                                 | 4   | do not know                                    |
| variable name<br>v_83  | external variable name<br>v_83  | int | other foods                                    |
|                        |                                 | 1   | winner                                         |
|                        |                                 | 2   | neither                                        |
|                        |                                 | 3   | loser                                          |
|                        |                                 | 4   | do not know                                    |

| variable name<br>v_84 | external variable name<br>v_84 | int | agricultural engineering and<br>machinery |
|-----------------------|--------------------------------|-----|-------------------------------------------|
|                       |                                | 1   | winner                                    |
|                       |                                | 2   | neither                                   |
|                       |                                | 3   | loser                                     |
|                       |                                | 4   | do not know                               |
| variable name<br>v_85 | external variable name<br>v_85 | int | feedstuff products                        |
|                       |                                | 1   | winner                                    |
|                       |                                | 2   | neither                                   |
|                       |                                | 3   | loser                                     |
|                       |                                | 4   | do not know                               |
| variable name<br>v_87 | external variable name<br>v_87 | int | livestock breeding                        |
|                       |                                | 1   | winner                                    |
|                       |                                | 2   | neither                                   |
|                       |                                | 3   | loser                                     |
|                       |                                | 4   | do not know                               |
| variable name<br>v_86 | external variable name<br>v_86 | int | plant cultivation                         |
|                       |                                | 1   | winner                                    |
|                       |                                | 2   | neither                                   |
|                       |                                | 3   | loser                                     |
|                       |                                | 4   | do not know                               |

#### Notes / Supplementary information (q\_2965642 - type 142)

| variable name<br>v_88 | external variable name<br>v_88 | blob | text field |
|-----------------------|--------------------------------|------|------------|
|-----------------------|--------------------------------|------|------------|

#### 7) In your opinion, what is special about TTIP as opposed to other free trade agreements? (q\_2965643 - type 142)

| variable name<br>v_89 | external variable name<br>v_89 | blob | text field |
|-----------------------|--------------------------------|------|------------|
|-----------------------|--------------------------------|------|------------|

Standard page (PGID 1618922)

Part 2: Questions on trade with EU member states

1) How do you assess the current export competence (level of knowledge) of US companies in relation to the EU market? (q\_2962538 - type 111)

| variable name<br>v_11 | external variable name<br>v_11 | int | level of knowledge   |
|-----------------------|--------------------------------|-----|----------------------|
|                       |                                | 1   | very good knowledge  |
|                       |                                | 2   | good knowledge       |
|                       |                                | 3   | minimal knowledge    |
|                       |                                | 4   | no knowledge present |

## Notes / Supplementary information (q\_2965648 - type 142)

| variable name | external variable name |      |            |
|---------------|------------------------|------|------------|
| v_90          | v_90                   | blob | text field |

## 2) Are there cultural differences in business practices between the US and EU countries? (q\_2976000 - type 111)

| variable name | external variable name |     |                    |
|---------------|------------------------|-----|--------------------|
| v_227         | v_227                  | int | business practices |
|               |                        | 1   | yes                |
|               |                        | 2   | partly/partly      |
|               |                        | 3   | no                 |
|               |                        | 4   | do not know        |

## Notes / Supplementary information (q\_2975999 - type 142)

| variable name | external variable name |      |            |
|---------------|------------------------|------|------------|
| v_226         | v_226                  | blob | text field |

## 3) How do you think the coordination process will develop between the economic parties along the food supply chain (customer-supplier relationship) in the how should the EU and the US behave? The need for coordination will ... (q\_2965652 - type 111)

| variable name | external variable name |     |                                                            |
|---------------|------------------------|-----|------------------------------------------------------------|
| v_91          | v_91                   | int | customer-supplier relationship along the food supply chain |
|               |                        | 1   | strongly decrease                                          |
|               |                        | 2   | decrease slightly                                          |
|               |                        | 3   | do not change                                              |
|               |                        | 4   | increase slightly                                          |
|               |                        | 5   | strongly increase                                          |
|               |                        | 6   | do not know                                                |

## Notes / Supplementary information (q\_2965662 - type 142)

| variable name | external variable name |      |            |
|---------------|------------------------|------|------------|
| v_92          | v_92                   | blob | text field |

## 4) Do you see possibilities to coordinate global trade relations more internationally, for example, to make them more compatible, more economical, more reliable and more sustainable? (q\_2965665 - type 111)

| variable name | external variable name |     |                        |
|---------------|------------------------|-----|------------------------|
| v_93          | v_93                   | int | global trade relations |
|               |                        | 1   | yes                    |
|               |                        | 2   | no                     |
|               |                        | 3   | do not know            |

## If so, which one? Please explain. (q\_2965669 - type 142)

| variable name | external variable name |      |            |
|---------------|------------------------|------|------------|
| v_94          | v_94                   | blob | text field |

## 5) In your opinion, which governmental, regulatory and scientific support measures will export-oriented companies need in the future? (q\_2965671 - type 142)

| variable name | external variable name |      |            |
|---------------|------------------------|------|------------|
| v_95          | v_95                   | blob | text field |

Standard page (PGID 1618923)

Part 3: Questions on quality management in the agri-food sector

1) Which role do international quality standards play in global trade at the moment or after the agreement in force?  
(q\_2976023 - type 311)

| variable name | external variable name | int | at the moment     |
|---------------|------------------------|-----|-------------------|
| v_229         | v_229                  |     |                   |
|               |                        | 1   | a very large role |
|               |                        | 2   | a major role      |
|               |                        | 3   | a medium role     |
|               |                        | 4   | a minor role      |
|               |                        | 5   | do not know       |
| variable name | external variable name | int | TTIP in force     |
| v_230         | v_230                  |     |                   |
|               |                        | 1   | a very large role |
|               |                        | 2   | a major role      |
|               |                        | 3   | a medium role     |
|               |                        | 4   | a minor role      |
|               |                        | 5   | do not know       |

Notes / Supplementary information (q\_2965706 - type 142)

| variable name | external variable name | blob | text field |
|---------------|------------------------|------|------------|
| v_96          | v_96                   |      |            |

2) How do you estimate the degree of dissemination of international quality standards and private standards in the US?  
(q\_2965707 - type 311)

| variable name | external variable name | int | DIN EN ISO 9000 ff (standards for quality management systems)   |
|---------------|------------------------|-----|-----------------------------------------------------------------|
| v_97          | v_97                   |     |                                                                 |
|               |                        | 1   | very high                                                       |
|               |                        | 2   | high                                                            |
|               |                        | 3   | medium                                                          |
|               |                        | 4   | low                                                             |
|               |                        | 5   | not used                                                        |
|               |                        | 6   | do not know                                                     |
|               |                        | 7   | N/A                                                             |
| variable name | external variable name | int | DIN EN ISO 19011 (Guideline for auditing of management systems) |
| v_98          | v_98                   |     |                                                                 |
|               |                        | 1   | very high                                                       |
|               |                        | 2   | high                                                            |
|               |                        | 3   | medium                                                          |
|               |                        | 4   | low                                                             |
|               |                        | 5   | not used                                                        |
|               |                        | 6   | do not know                                                     |
|               |                        | 7   | N/A                                                             |

| variable name<br>v_99  | external variable name<br>v_99  | int | DIN EN ISO 22000 (standards for<br>management systems for food<br>safety) |
|------------------------|---------------------------------|-----|---------------------------------------------------------------------------|
|                        |                                 | 1   | very high                                                                 |
|                        |                                 | 2   | high                                                                      |
|                        |                                 | 3   | medium                                                                    |
|                        |                                 | 4   | low                                                                       |
|                        |                                 | 5   | not used                                                                  |
|                        |                                 | 6   | do not know                                                               |
|                        |                                 | 7   | N/A                                                                       |
| variable name<br>v_100 | external variable name<br>v_100 | int | other international standards                                             |
|                        |                                 | 1   | very high                                                                 |
|                        |                                 | 2   | high                                                                      |
|                        |                                 | 3   | medium                                                                    |
|                        |                                 | 4   | low                                                                       |
|                        |                                 | 5   | not used                                                                  |
|                        |                                 | 6   | do not know                                                               |
|                        |                                 | 7   | N/A                                                                       |
| variable name<br>v_101 | external variable name<br>v_101 | int | IFS - International Featured Stand-<br>ard                                |
|                        |                                 | 1   | very high                                                                 |
|                        |                                 | 2   | high                                                                      |
|                        |                                 | 3   | medium                                                                    |
|                        |                                 | 4   | low                                                                       |
|                        |                                 | 5   | not used                                                                  |
|                        |                                 | 6   | do not know                                                               |
|                        |                                 | 7   | N/A                                                                       |
| variable name<br>v_102 | external variable name<br>v_102 | int | BRC - British Retail Consortium<br>Standard                               |
|                        |                                 | 1   | very high                                                                 |
|                        |                                 | 2   | high                                                                      |
|                        |                                 | 3   | medium                                                                    |
|                        |                                 | 4   | low                                                                       |
|                        |                                 | 5   | not used                                                                  |
|                        |                                 | 6   | do not know                                                               |
|                        |                                 | 7   | N/A                                                                       |
| variable name<br>v_103 | external variable name<br>v_103 | int | QS Standard - Quality and Safety<br>GmbH                                  |
|                        |                                 | 1   | very high                                                                 |
|                        |                                 | 2   | high                                                                      |
|                        |                                 | 3   | medium                                                                    |
|                        |                                 | 4   | low                                                                       |
|                        |                                 | 5   | not used                                                                  |
|                        |                                 | 6   | do not know                                                               |
|                        |                                 | 7   | N/A                                                                       |

| variable name | external variable name | int | Global GAP Standard     |
|---------------|------------------------|-----|-------------------------|
| v_104         | v_104                  |     |                         |
|               |                        | 1   | very high               |
|               |                        | 2   | high                    |
|               |                        | 3   | medium                  |
|               |                        | 4   | low                     |
|               |                        | 5   | not used                |
|               |                        | 6   | do not know             |
|               |                        | 7   | N/A                     |
| variable name | external variable name | int | GMP+ Standard           |
| v_105         | v_105                  |     |                         |
|               |                        | 1   | very high               |
|               |                        | 2   | high                    |
|               |                        | 3   | medium                  |
|               |                        | 4   | low                     |
|               |                        | 5   | not used                |
|               |                        | 6   | do not know             |
|               |                        | 7   | N/A                     |
| variable name | external variable name | int | other private standards |
| v_106         | v_106                  |     |                         |
|               |                        | 1   | very high               |
|               |                        | 2   | high                    |
|               |                        | 3   | medium                  |
|               |                        | 4   | low                     |
|               |                        | 5   | not used                |
|               |                        | 6   | do not know             |
|               |                        | 7   | N/A                     |

What other quality standards are relevant in the US? (q\_2965715 - type 142)

| variable name | external variable name | blob | text field |
|---------------|------------------------|------|------------|
| v_107         | v_107                  |      |            |

3) Please estimate what percentage of firms in the US are certified to international quality standards. (q\_2965719 - type 143)

| variable name | external variable name | blob | percentage (with type check: Integer) |
|---------------|------------------------|------|---------------------------------------|
| v_108         | v_108                  |      |                                       |

Notes / Supplementary information (q\_2965722 - type 142)

| variable name | external variable name | blob | text field |
|---------------|------------------------|------|------------|
| v_111         | v_111                  |      |            |

4) Is there a shortage of skilled workers in the field of "quality management in the agri-food industry" in the US? (q\_2965911 - type 111)

| variable name | external variable name |     |                             |
|---------------|------------------------|-----|-----------------------------|
| v_113         | v_113                  | int | shortage of skilled workers |
|               |                        | 1   | yes                         |
|               |                        | 2   | partly/partly               |
|               |                        | 3   | no                          |
|               |                        | 4   | do not know                 |

Notes / Supplementary information (q\_2965956 - type 142)

| variable name | external variable name |      |            |
|---------------|------------------------|------|------------|
| v_114         | v_114                  | blob | text field |

5) In your opinion, how important are education and training initiatives - especially for food quality managers - in the US? (q\_2965957 - type 111)

| variable name | external variable name |     |                                                  |
|---------------|------------------------|-----|--------------------------------------------------|
| v_115         | v_115                  | int | importance of education and training initiatives |
|               |                        | 1   | very important                                   |
|               |                        | 2   | important                                        |
|               |                        | 3   | neutral                                          |
|               |                        | 4   | rather unimportant                               |
|               |                        | 5   | highly unimportant                               |
|               |                        | 6   | do not know                                      |

Notes / Supplementary information (q\_2965962 - type 142)

| variable name | external variable name |      |            |
|---------------|------------------------|------|------------|
| v_116         | v_116                  | blob | text field |

Standard page (PGID 1618924)

Part 4: General concluding questions

1) Are you willing to participate in further surveys as part of this research? (q\_2965472 - type 111)

| variable name | external variable name |     |                 |
|---------------|------------------------|-----|-----------------|
| v_28          | v_28                   | int | further surveys |
|               |                        | 1   | yes             |
|               |                        | 2   | maybe           |
|               |                        | 3   | no              |

2) Is there a possibility in the further course of research to conduct a survey with the AHK member companies of the US? (q\_2965473 - type 111)

| variable name | external variable name |     |                                               |
|---------------|------------------------|-----|-----------------------------------------------|
| v_29          | v_29                   | int | further surveys with the AHK member companies |
|               |                        | 1   | yes                                           |
|               |                        | 2   | maybe                                         |
|               |                        | 3   | no                                            |

3) Do you have any other suggestions or ideas you would like to share with us? (q\_2965478 - type 142)

| variable name | external variable name |      |            |
|---------------|------------------------|------|------------|
| v_30          | v_30                   | blob | text field |

4) If you would like to be informed about the results of this survey, please enter your e-mail address. Your data will not be passed on to third parties. (q\_2965479 - type 141)

| variable name | external variable name |         |            |
|---------------|------------------------|---------|------------|
| v_31          | v_31                   | varchar | text field |

Thank you for your participation!

### Filter EU (PGID 1618925)

Standard page (PGID 1618926)

Part 1: Questions on TTIP

1a) In your opinion, how high is the level of information on the TTIP negotiations and/or the TTIP treaty content in your country? (q\_2973328 - type 311)

| variable name | external variable name |     |                        |
|---------------|------------------------|-----|------------------------|
| v_126         | dupl1_v_13             | int | business professionals |
|               |                        | 1   | very high              |
|               |                        | 2   | high                   |
|               |                        | 3   | intermediate           |
|               |                        | 4   | low                    |
|               |                        | 5   | very low               |
|               |                        | 6   | do not know            |
| variable name | external variable name |     |                        |
| v_127         | dupl1_v_14             | int | general public         |
|               |                        | 1   | very high              |
|               |                        | 2   | high                   |
|               |                        | 3   | intermediate           |
|               |                        | 4   | low                    |
|               |                        | 5   | very low               |
|               |                        | 6   | do not know            |

1b) Are there counter-movements / TTIP opponents? (q\_2973329 - type 111)

| variable name | external variable name |     |                                  |
|---------------|------------------------|-----|----------------------------------|
| v_128         | dupl1_v_33             | int | counterparts                     |
|               |                        | 1   | Yes, there are TTIP opponents.   |
|               |                        | 2   | No, there are no TTIP opponents. |
|               |                        | 3   | do not know                      |

Notes / Supplementary information (q\_2973330 - type 142)

| variable name | external variable name |      |            |
|---------------|------------------------|------|------------|
| v_129         | dupl1_v_34             | blob | text field |

2) Which reliable sources of information on TTIP does your chamber use? (q\_2973331 - type143)

| variable name | external variable name |         |                        |
|---------------|------------------------|---------|------------------------|
| v_130         | dupl1_v_35             | varchar | 1 <sup>st</sup> choice |
| variable name | external variable name |         |                        |
| v_131         | dupl1_v_36             | varchar | 2nd choice             |
| variable name | external variable name |         |                        |
| v_132         | dupl1_v_37             | varchar | 3rd choice             |

Notes / Supplementary information (q\_2973332 - type 142)

| variable name | external variable name |      |            |
|---------------|------------------------|------|------------|
| v_133         | dupl1_v_38             | blob | text field |

3) What is the awareness of the TTIP issue among your member companies? (q\_2973333 - type 111)

| variable name | external variable name |     |                       |
|---------------|------------------------|-----|-----------------------|
| v_134         | dupl1_v_44             | int | awareness of the TTIP |
|               |                        | 1   | very high awareness   |
|               |                        | 2   | high awareness        |
|               |                        | 3   | neutral awareness     |
|               |                        | 4   | low awareness         |
|               |                        | 5   | very low awareness    |
|               |                        | 6   | do not know           |

Notes / Supplementary information (q\_2973334 - type 142)

| variable name | external variable name |      |            |
|---------------|------------------------|------|------------|
| v_135         | dupl1_v_45             | blob | text field |

4) How many enquiries has your chamber received on TTIP? (q\_2973335 - type 143)

| variable name | external variable name | varchar (with type check: Integer) |         |
|---------------|------------------------|------------------------------------|---------|
| v_136         | dupl1_v_71             |                                    | monthly |
| variable name | external variable name | varchar (with type check: Integer) |         |
| v_234         | v_234                  |                                    | 2016    |
| variable name | external variable name | varchar (with type check: Integer) |         |
| v_137         | dupl1_v_72             |                                    | 2015    |
| variable name | external variable name | varchar (with type check: Integer) |         |
| v_138         | dupl1_v_73             |                                    | 2014    |

Notes / Supplementary information (q\_2973336 - type 142)

| variable name | external variable name |      |            |
|---------------|------------------------|------|------------|
| v_139         | dupl1_v_74             | blob | text field |

5) Which companies do you think will benefit from TTIP? (q\_2973337 type 121)

| variable name | external variable name |     |                                                                        |
|---------------|------------------------|-----|------------------------------------------------------------------------|
| v_140         | dupl1_v_117            | int | Micro enterprises (up to 9 Employees, up to € 2 million Turnover/year) |
|               |                        | 0   | not quoted                                                             |
|               |                        | 1   | quoted                                                                 |

| variable name | external variable name | int | Small enterprises (up to 49 Employees, up to € 10 million Turnover/year)      |
|---------------|------------------------|-----|-------------------------------------------------------------------------------|
| v_141         | dupl1_v_118            | 0   | not quoted                                                                    |
|               |                        | 1   | quoted                                                                        |
| variable name | external variable name | int | Medium-sized companies (up to 249 Employees, up to €50 million Turnover/year) |
| v_142         | dupl1_v_123            | 0   | not quoted                                                                    |
|               |                        | 1   | quoted                                                                        |
| variable name | external variable name | int | Large enterprises (over 250 Employees, over € 50 million Turnover/year)       |
| v_143         | dupl1_v_119            | 0   | not quoted                                                                    |
|               |                        | 1   | quoted                                                                        |
| variable name | external variable name | int | none of the above                                                             |
| v_144         | dupl1_v_121            | 0   | not quoted                                                                    |
|               |                        | 1   | quoted                                                                        |
| variable name | external variable name | int | do not know                                                                   |
| v_145         | dupl1_v_122            | 0   | not quoted                                                                    |
|               |                        | 1   | quoted                                                                        |

Notes / Supplementary information (q\_2973338 - type 142)

| variable name | external variable name | blob | text field |
|---------------|------------------------|------|------------|
| v_146         | dupl1_v_76             |      |            |

6) Which branches of the agri-food sector will be the winners/losers of TTIP? (q\_2973339 - type 311)

| variable name | external variable name | int | non-alcoholic beverages |
|---------------|------------------------|-----|-------------------------|
| v_147         | dupl1_v_77             | 1   | winner                  |
|               |                        | 2   | neither                 |
|               |                        | 3   | loser                   |
|               |                        | 4   | do not know             |
| variable name | external variable name | int | alcoholic beverages     |
| v_148         | dupl1_v_78             | 1   | winner                  |
|               |                        | 2   | neither                 |
|               |                        | 3   | loser                   |
|               |                        | 4   | do not know             |

| variable name<br>v_149 | external variable name<br>dupl1_v_79 | int | meat and sausage products                      |
|------------------------|--------------------------------------|-----|------------------------------------------------|
|                        |                                      | 1   | winner                                         |
|                        |                                      | 2   | neither                                        |
|                        |                                      | 3   | loser                                          |
|                        |                                      | 4   | do not know                                    |
| variable name<br>v_150 | external variable name<br>dupl1_v_80 | int | fruits and vegetables, potatoes                |
|                        |                                      | 1   | winner                                         |
|                        |                                      | 2   | neither                                        |
|                        |                                      | 3   | loser                                          |
|                        |                                      | 4   | do not know                                    |
| variable name<br>v_151 | external variable name<br>dupl1_v_81 | int | dairy products<br>(cheese, butter, milk, etc.) |
|                        |                                      | 1   | winner                                         |
|                        |                                      | 2   | neither                                        |
|                        |                                      | 3   | loser                                          |
|                        |                                      | 4   | do not know                                    |
| variable name<br>v_152 | external variable name<br>dupl1_v_82 | int | confectionery, sweets and salty<br>snacks      |
|                        |                                      | 1   | winner                                         |
|                        |                                      | 2   | neither                                        |
|                        |                                      | 3   | loser                                          |
|                        |                                      | 4   | do not know                                    |
| variable name<br>v_235 | external variable name<br>v_235      | int | bread and pastry products, mills               |
|                        |                                      | 1   | winner                                         |
|                        |                                      | 2   | neither                                        |
|                        |                                      | 3   | loser                                          |
|                        |                                      | 4   | do not know                                    |
| variable name<br>v_153 | external variable name<br>dupl1_v_83 | int | other foods                                    |
|                        |                                      | 1   | winner                                         |
|                        |                                      | 2   | neither                                        |
|                        |                                      | 3   | loser                                          |
|                        |                                      | 4   | do not know                                    |
| variable name<br>v_154 | external variable name<br>dupl1_v_84 | int | agricultural engineering and<br>machinery      |
|                        |                                      | 1   | winner                                         |
|                        |                                      | 2   | neither                                        |
|                        |                                      | 3   | loser                                          |
|                        |                                      | 4   | do not know                                    |

| variable name | external variable name | int | feedstuff products |
|---------------|------------------------|-----|--------------------|
| v_155         | dupl1_v_85             |     |                    |
|               |                        | 1   | winner             |
|               |                        | 2   | neither            |
|               |                        | 3   | loser              |
|               |                        | 4   | do not know        |
| variable name | external variable name | int | livestock breeding |
| v_157         | dupl1_v_87             |     |                    |
|               |                        | 1   | winner             |
|               |                        | 2   | neither            |
|               |                        | 3   | loser              |
|               |                        | 4   | do not know        |
| variable name | external variable name | int | plant cultivation  |
| v_156         | dupl1_v_86             |     |                    |
|               |                        | 1   | winner             |
|               |                        | 2   | neither            |
|               |                        | 3   | loser              |
|               |                        | 4   | do not know        |

#### Notes / Supplementary information (q\_2973340 - type 142)

| variable name | external variable name | blob | text field |
|---------------|------------------------|------|------------|
| v_158         | dupl1_v_88             |      |            |

#### 7) In your opinion, what is special about TTIP as opposed to other free trade agreements? (q\_2973341 - type 142)

| variable name | external variable name | blob | text field |
|---------------|------------------------|------|------------|
| v_159         | dupl1_v_89             |      |            |

Standard page (PGID 1618928)

Part 2: Questions on trade with the US

#### 1) How do you assess the current export competence (level of knowledge) of companies in your country in relation to the US market? (q\_2973356 - type 111)

| variable name | external variable name | int | level of knowledge   |
|---------------|------------------------|-----|----------------------|
| v_194         | dupl1_v_11             |     |                      |
|               |                        | 1   | very good knowledge  |
|               |                        | 2   | good knowledge       |
|               |                        | 3   | minimal knowledge    |
|               |                        | 4   | no knowledge present |

#### Notes / Supplementary information (q\_2973357 - type 142)

| variable name | external variable name | blob | text field |
|---------------|------------------------|------|------------|
| v_195         | dupl1_v_90             |      |            |

2) Are there cultural differences in business practices between your country and the US? (q\_2976087 - type 111)

| variable name | external variable name | int | business practices |
|---------------|------------------------|-----|--------------------|
| v_236         | v_236                  |     |                    |
|               |                        | 1   | yes                |
|               |                        | 2   | partly/partly      |
|               |                        | 3   | no                 |
|               |                        | 4   | do not know        |

Notes / Supplementary information (q\_2976088 - type 142)

| variable name | external variable name | blob | text field |
|---------------|------------------------|------|------------|
| v_237         | v_237                  |      |            |

3) How do you think the coordination process will develop between the economic parties along the food supply chain (customer-supplier relationship) in the how should the EU and the US behave? The need for coordination will ... (q\_2973358 - type 111)

| variablename | external variable name | int | customer-supplier relationship along the food supply chain |
|--------------|------------------------|-----|------------------------------------------------------------|
| v_196        | dupl1_v_91             |     |                                                            |
|              |                        | 1   | strongly decrease                                          |
|              |                        | 2   | decrease slightly                                          |
|              |                        | 3   | do not change                                              |
|              |                        | 4   | increase slightly                                          |
|              |                        | 5   | strongly increase                                          |
|              |                        | 6   | do not know                                                |

Notes / Supplementary information ((q\_2973359 - type 142)

| variable name | external variable name | blob | text field |
|---------------|------------------------|------|------------|
| v_197         | dupl1_v_92             |      |            |

4) Do you see possibilities to coordinate global trade relations more internationally, for example, to make them more compatible, more economical, more reliable and more sustainable? (q\_2973360 - type 111)

| variable name | external variable name | int | global trade relations |
|---------------|------------------------|-----|------------------------|
| v_198         | dupl1_v_93             |     |                        |
|               |                        | 1   | yes                    |
|               |                        | 2   | no                     |
|               |                        | 3   | do not know            |

If so, which one? Please explain. (q\_2973361 - type 142)

| variablename | external variable name | blob | text field |
|--------------|------------------------|------|------------|
| v_199        | dupl1_v_94             |      |            |

5) In your opinion, which governmental, regulatory and scientific support measures will export-oriented companies need in the future? (q\_2973362 - type 142)

| variable name | external variable name | blob | text field |
|---------------|------------------------|------|------------|
| v_200         | dupl1_v_95             |      |            |

Standard page (PGID 1618929)

Part 3: Questions on quality management in the agri-food sector

1) Which role do international quality standards play in global trade at the moment or after the agreement in force?  
(q\_2976091 - type 311)

| variable name | external variable name | int | at the moment     |
|---------------|------------------------|-----|-------------------|
| v_238         | v_238                  |     |                   |
|               |                        | 1   | a very large role |
|               |                        | 2   | a major role      |
|               |                        | 3   | a medium role     |
|               |                        | 4   | a minor role      |
|               |                        | 5   | do not know       |
| variable name | external variable name | int | TTIP in force     |
| v_239         | v_239                  |     |                   |
|               |                        | 1   | a very large role |
|               |                        | 2   | a major role      |
|               |                        | 3   | a medium role     |
|               |                        | 4   | a minor role      |
|               |                        | 5   | do not know       |

Notes / Supplementary information (q\_2973364 - type 142)

| variable name | external variable name | blob | text field |
|---------------|------------------------|------|------------|
| v_202         | dupl1_v_96             |      |            |

2) How do you estimate the degree of dissemination of international quality standards and private standards in your country? (q\_2973365 - type 311)

| variable name | external variable name | int | DIN EN ISO 9000 ff (standards for quality management systems)   |
|---------------|------------------------|-----|-----------------------------------------------------------------|
| v_203         | dupl1_v_97             |     |                                                                 |
|               |                        | 1   | very high                                                       |
|               |                        | 2   | high                                                            |
|               |                        | 3   | medium                                                          |
|               |                        | 4   | low                                                             |
|               |                        | 5   | not used                                                        |
|               |                        | 6   | do not know                                                     |
|               |                        | 7   | N/A                                                             |
| variable name | external variable name | int | DIN EN ISO 19011 (Guideline for auditing of management systems) |
| v_204         | dupl1_v_98             |     |                                                                 |
|               |                        | 1   | very high                                                       |
|               |                        | 2   | high                                                            |
|               |                        | 3   | medium                                                          |
|               |                        | 4   | low                                                             |
|               |                        | 5   | not used                                                        |
|               |                        | 6   | do not know                                                     |
|               |                        | 7   | N/A                                                             |

| variable name<br>v_205 | external variable name<br>dupl1_v_99  | int | DIN EN ISO 22000 (standards for<br>management systems for food<br>safety) |
|------------------------|---------------------------------------|-----|---------------------------------------------------------------------------|
|                        |                                       | 1   | very high                                                                 |
|                        |                                       | 2   | high                                                                      |
|                        |                                       | 3   | medium                                                                    |
|                        |                                       | 4   | low                                                                       |
|                        |                                       | 5   | not used                                                                  |
|                        |                                       | 6   | do not know                                                               |
|                        |                                       | 7   | N/A                                                                       |
| variable name<br>v_206 | external variable name<br>dupl1_v_100 | int | other international standards                                             |
|                        |                                       | 1   | very high                                                                 |
|                        |                                       | 2   | high                                                                      |
|                        |                                       | 3   | medium                                                                    |
|                        |                                       | 4   | low                                                                       |
|                        |                                       | 5   | not used                                                                  |
|                        |                                       | 6   | do not know                                                               |
|                        |                                       | 7   | N/A                                                                       |
| variable name<br>v_207 | external variable name<br>dupl1_v_101 | int | IFS - International Featured Stand-<br>ard                                |
|                        |                                       | 1   | very high                                                                 |
|                        |                                       | 2   | high                                                                      |
|                        |                                       | 3   | medium                                                                    |
|                        |                                       | 4   | low                                                                       |
|                        |                                       | 5   | not used                                                                  |
|                        |                                       | 6   | do not know                                                               |
|                        |                                       | 7   | N/A                                                                       |
| variable name<br>v_208 | external variable name<br>dupl1_v_102 | int | BRC - British Retail Consortium<br>Standard                               |
|                        |                                       | 1   | very high                                                                 |
|                        |                                       | 2   | high                                                                      |
|                        |                                       | 3   | medium                                                                    |
|                        |                                       | 4   | low                                                                       |
|                        |                                       | 5   | not used                                                                  |
|                        |                                       | 6   | do not know                                                               |
|                        |                                       | 7   | N/A                                                                       |
| variable name<br>v_209 | external variable name<br>dupl1_v_103 | int | QS Standard - Quality and Safety<br>GmbH                                  |
|                        |                                       | 1   | very high                                                                 |
|                        |                                       | 2   | high                                                                      |
|                        |                                       | 3   | medium                                                                    |
|                        |                                       | 4   | low                                                                       |
|                        |                                       | 5   | not used                                                                  |
|                        |                                       | 6   | do not know                                                               |
|                        |                                       | 7   | N/A                                                                       |

| variable name | external variable name | int | Global GAP Standard     |
|---------------|------------------------|-----|-------------------------|
| v_210         | dupl1_v_104            |     |                         |
|               |                        | 1   | very high               |
|               |                        | 2   | high                    |
|               |                        | 3   | medium                  |
|               |                        | 4   | low                     |
|               |                        | 5   | not used                |
|               |                        | 6   | do not know             |
|               |                        | 7   | N/A                     |
| variablename  | external variable name | int | GMP+ Standard           |
| v_211         | dupl1_v_105            |     |                         |
|               |                        | 1   | very high               |
|               |                        | 2   | high                    |
|               |                        | 3   | medium                  |
|               |                        | 4   | low                     |
|               |                        | 5   | not used                |
|               |                        | 6   | do not know             |
|               |                        | 7   | N/A                     |
| variable name | external variable name | int | other private standards |
| v_212         | dupl1_v_106            |     |                         |
|               |                        | 1   | very high               |
|               |                        | 2   | high                    |
|               |                        | 3   | medium                  |
|               |                        | 4   | low                     |
|               |                        | 5   | not used                |
|               |                        | 6   | do not know             |
|               |                        | 7   | N/A                     |

What other quality standards are relevant in your country? (q\_2973366 type 142)

| variable name | external variable name | blob | text field |
|---------------|------------------------|------|------------|
| v_213         | dupl1_v_107            |      |            |

3) Please estimate what percentage of firms in your country are certified to international quality standards. (q\_2973367 - type 143)

| variablename | external variable name | blob | percentage (with type check: Integer) |
|--------------|------------------------|------|---------------------------------------|
| v_214        | dupl1_v_108            |      |                                       |

Notes / Supplementary information (q\_2973368 - type 142)

| variablename | external variable name | blob | text field |
|--------------|------------------------|------|------------|
| v_215        | dupl1_v_111            |      |            |

4) Is there a shortage of skilled workers in the field of "quality management in the agri-food industry" in your country? (q\_2973369 - type 111)

| variable name | external variable name |     |                             |
|---------------|------------------------|-----|-----------------------------|
| v_216         | dupl1_v_113            | int | shortage of skilled workers |
|               |                        | 1   | yes                         |
|               |                        | 2   | partly/partly               |
|               |                        | 3   | no                          |
|               |                        | 4   | do not know                 |

Notes / Supplementary information (q\_2973370 - type 142)

| variable name | external variable name |      |            |
|---------------|------------------------|------|------------|
| v_217         | dupl1_v_114            | blob | text field |

5) In your opinion, how important are education and training initiatives - especially for food quality managers - in your country? (q\_2973371 - type 111)

| variable name | external variable name |     |                                                  |
|---------------|------------------------|-----|--------------------------------------------------|
| v_218         | dupl1_v_115            | int | importance of education and training initiatives |
|               |                        | 1   | very important                                   |
|               |                        | 2   | important                                        |
|               |                        | 3   | neutral                                          |
|               |                        | 4   | rather unimportant                               |
|               |                        | 5   | highly unimportant                               |
|               |                        | 6   | do not know                                      |

Notes / Supplementary information (q\_2973372 - type 142)

| variable name | external variable name |      |            |
|---------------|------------------------|------|------------|
| v_219         | dupl1_v_116            | blob | text field |

Standard page (PGID 1618930)

Part 4: General concluding questions

1) Are you willing to participate in further surveys as part of this research? (q\_2973373 - type 111)

| variable name | external variable name |     |                 |
|---------------|------------------------|-----|-----------------|
| v_220         | dupl1_v_28             | int | further surveys |
|               |                        | 1   | yes             |
|               |                        | 2   | maybe           |
|               |                        | 3   | no              |

2) Is there a possibility in the further course of research to conduct a survey with the AHK member companies of your country? (q\_2973374 - type 111)

| variable name | external variable name |     |                                               |
|---------------|------------------------|-----|-----------------------------------------------|
| v_221         | dupl1_v_29             | int | further surveys with the AHK member companies |
|               |                        | 1   | yes                                           |
|               |                        | 2   | maybe                                         |
|               |                        | 3   | no                                            |

---

3) Do you have any other suggestions or ideas you would like to share with us? (q\_2973375 - type 142)

| variable name | external variable name |      |            |
|---------------|------------------------|------|------------|
| v_222         | dupl1_v_30             | blob | text field |

4) If you would like to be informed about the results of this survey, please enter your e-mail address. Your data will not be passed on to third parties. (q\_2973376 - type 141)

| variable name | external variable name |         |            |
|---------------|------------------------|---------|------------|
| v_223         | dupl1_v_31             | varchar | text field |

Thank you for your participation!
